# Supplementary material
Source: ML conference proceedings conference paper supplement (https://openreview.net/forum?id=Cgmk9CicWFl)
Supplement: supplementary_material [file attachment]

---

# RSA: Reducing Semantic Shift from Aggressive Augmentations for Self-supervised Learning

## Supplementary

---

Anonymous Author(s)

Affiliation

Address

email

### 1 A Adaptability study

Table 1: Performance comparison with linear classification for 200 epochs. The mean and standard deviation are computed over three trails.

| Method        | CIFAR-100                      | STL-10                         | ImageNet-100 |
|---------------|--------------------------------|--------------------------------|--------------|
| SimSiam       | 56.2 $\pm$ 1.2                 | 85.7 $\pm$ 0.3                 | 82.6         |
| Simsiam + RSA | <b>63.8<math>\pm</math>0.4</b> | <b>89.9<math>\pm</math>0.5</b> | <b>84.0</b>  |

2 To evaluate the adaptability, we build our proposed RSA on SimSiam [1], termed SimSiam + RSA.  
3 Specifically, we change the same similarity function from mean square error to negative cosine  
4 similarity and adopt the same settings for all the hype-parameters mentioned in Section 4.1. We  
5 conduct experiments on CIFAR-100 [3], STL-10 [2], and ImageNet-100 [4] for 200 epochs.

6 As illustrated in Table 1, we observe that the proposed RSA achieves better transfer performance  
7 than SimSiam on three datasets. For instance, RSA significantly raise the accuracy of linear probing  
8 from 56.2% to 63.8% (+7.6%) on the CIFAR-100 dataset. Therefore, our proposed method does not  
9 rely on the momentum network, demonstrating the adaptability of RSA.

### 10 References

- 11 [1] Xinlei Chen and Kaiming He. Exploring simple siamese representation learning. In *CVPR*, pages 15750–  
12 15758, 2021.
- 13 [2] Adam Coates, Andrew Y. Ng, and Honglak Lee. An analysis of single-layer networks in unsupervised  
14 feature learning. In *AISTATS*, pages 215–223, 2011.
- 15 [3] Alex Krizhevsky, Geoffrey Hinton, et al. Learning multiple layers of features from tiny images. Technical  
16 report, 2009.
- 17 [4] Yonglong Tian, Dilip Krishnan, and Phillip Isola. Contrastive multiview coding. In *ECCV*, pages 776–794,  
18 2020.
